# Supplementary material for: National Alliance of Business and Career Education. Monographs on Career Education.
Source: Oxford University Press journal article supplement (doi:10.1242/jeb.243924), 1978-06-01
Supplement: jeb243924supp.pdf [file jeb243924supp.pdf]

**Table S1.** Ultraviolet-B and ultraviolet-A irradiances ( $\mu\text{W cm}^{-2}$ ) and cumulative dose estimates ( $\text{kJ m}^{-2}$ ) for each treatment

| Exposure duration (days) | Ultraviolet-B                        |                             | Ultraviolet-A                        |                             |
|--------------------------|--------------------------------------|-----------------------------|--------------------------------------|-----------------------------|
|                          | Irradiance ( $\mu\text{W cm}^{-2}$ ) | Dose ( $\text{kJ m}^{-2}$ ) | Irradiance ( $\mu\text{W cm}^{-2}$ ) | Dose ( $\text{kJ m}^{-2}$ ) |
| 1                        | Low (8.7 $\pm$ 0.6; 8h/day)          | 2.508 $\pm$ 0.160           | Low (39.6 $\pm$ 4.2; 8h/day)         | 11.397 $\pm$ 1.211          |
|                          | Medium (35.3 $\pm$ 2.4; 2h/day)      | 2.540 $\pm$ 0.169           | Medium (205.1 $\pm$ 17.3; 2h/day)    | 14.766 $\pm$ 1.245          |
|                          | High (70 $\pm$ 1.6; 1h/day)          | 2.522 $\pm$ 0.059           | High (470.0 $\pm$ 36.1; 1h/day)      | 16.920 $\pm$ 1.299          |
| 4                        | Low (8.7 $\pm$ 0.6; 8h/day)          | 10.032 $\pm$ 0.640          | Low (39.6 $\pm$ 4.2; 8h/day)         | 45.588 $\pm$ 4.844          |
|                          | Medium (35.3 $\pm$ 2.4; 2h/day)      | 10.160 $\pm$ 0.676          | Medium (205.1 $\pm$ 17.3; 2h/day)    | 59.064 $\pm$ 4.98           |
|                          | High (70 $\pm$ 1.6; 1h/day)          | 10.088 $\pm$ 0.236          | High (470.0 $\pm$ 36.1; 1h/day)      | 67.680 $\pm$ 5.196          |
| 8                        | Low (8.7 $\pm$ 0.6; 8h/day)          | 20.064 $\pm$ 1.280          | Low (39.6 $\pm$ 4.2; 8h/day)         | 91.176 $\pm$ 9.688          |
|                          | Medium (35.3 $\pm$ 2.4; 2h/day)      | 20.320 $\pm$ 1.352          | Medium (205.1 $\pm$ 17.3; 2h/day)    | 118.128 $\pm$ 9.960         |
|                          | High (70 $\pm$ 1.6; 1h/day)          | 20.176 $\pm$ 0.472          | High (470.0 $\pm$ 36.1; 1h/day)      | 135.36 $\pm$ 10.39          |

Animals in the no-UVBR control group were reared in the absence of UVBR. Measurements were taken using a radiometer/photometer (IL1400BL, International Light Inc., Newburyport, USA) at the water surface of each of the containers. Dose estimates were calculated based on the UVBR irradiance measurements. Values are presented as mean  $\pm$  standard deviation. These data are also presented in Lundsgaard et al. (2021) which reported on an earlier phase of this larger experiment.
